# Supplementary material for: Assessing the Role of Compaction in the Formation of Adcumulates: a Microstructural Perspective
Source: Oxford University Press journal article supplement (doi:10.1093/petrology/egx037), 2017-04-01
Supplement: Supplementary_HOLNESS_SD_Appendix_1_egx037.pdf [file Supplementary_HOLNESS_SD_Appendix_1_egx037.pdf]

**EBSD settings**

|                                         |               |               |
|-----------------------------------------|---------------|---------------|
| Background (frames)                     | 64            | 64            |
| Binning                                 | 4 x4          | 4 x 4         |
| Gain                                    | 10            | 10            |
| Hough resolution                        | 60            | 60            |
| Band detection (min/max)                | 6/7           | 6/7           |
| Noise reduction - wild spike'           | yes           | yes           |
| n Neighbour zero solution extrapolation | 5             | 5             |
| Kuwahara Filter                         | 3 x 3 / 5°/1° | 3 x 3 / 5°/1° |

| <b>Samples</b>    | 458242 | 320'6" | 458227 | 458277 | SK84 - 36322 - 1935.390/22 | 660   | 458289 | 90/22 | 450   | 118916 | 118917 | 118919 |
|-------------------|--------|--------|--------|--------|----------------------------|-------|--------|-------|-------|--------|--------|--------|
| X steps           | 1402   | 670    | 1410   | 1408   | 762                        | 1830  | 1323   | 1297  | 1678  | 889    | 754    | 754    |
| Y steps           | 917    | 483    | 899    | 560    | 492                        | 986   | 956    | 922   | 778   | 667    | 616    | 718    |
| Step size (µm)    | 20     | 40     | 20     | 20     | 40                         | 20    | 20     | 20    | 20    | 20     | 20     | 20     |
| Zero solution (%) | 21.16  | 11.17  | 22.86  | 28.46  | 18.47                      | 26.33 | 16.22  | 26.2  | 49.39 | 39.56  | 8.71   | 10.28  |

Phasesmean angular deviationmean angular deviation

|               |      |      |      |      |      |      |      |      |      |      |      |      |
|---------------|------|------|------|------|------|------|------|------|------|------|------|------|
| Plagioclase   | 0.48 | 0.45 | 0.6  | 0.57 | 0.64 | 0.6  | 0.58 | 0.69 | 0.85 | 0.79 | 0.77 | 0.73 |
| Olivine       | 0.38 | 0.33 | 0.53 | 0.5  | 0.58 | 0.53 | 0.48 | 0.64 | 0.84 | 0.79 | 0.74 | 0.73 |
| Clinopyroxene | 0.43 | 0.37 | 0.53 | 0.5  | 0.59 | 0.53 | 0.5  | 0.63 | 0.84 | 0.82 | 0.89 | 0.8  |
| Orthopyroxene | 0.5  | 0.33 | 0.63 | 0.63 | 0.63 | 0.6  | n/a  | 0.72 | 0.95 | n/a  | 0.94 | 0.9  |
| Ilmenite      | 0.3  | 0.31 | 0.42 | 0.42 | 0.5  | 0.44 | 0.37 | 0.52 | 0.74 | 0.87 | 0.67 | 0.64 |
| Magnetite     | 0.03 | 0.41 | n/a  | 0.6  | 0.6  | 0.6  | 0.47 | 0.57 | 0.91 | 0.69 | 0.75 | 0.67 |

References for the matching unitsReferences for the matching units

|               |                                                    |                                                  |
|---------------|----------------------------------------------------|--------------------------------------------------|
| Plagioclase   | American Mineralogist, (1990) vol 75. pp 150-162   | American Mineralogist, (1990) vol 75. pp 150-162 |
| Olivine       | Forsterite.cry (Aztec Database)                    | Forsterite.cry (Aztec Database)                  |
| Clinopyroxene | American Mineralogist, (1981) vol 66. pp 315 - 323 | Diopside.cry (Aztec Database)                    |
| Orthopyroxene | American Mineralogist, (1995) vol 80. pp 9-20      | Enstatite.cry (Aztec Database)                   |
| Ilmenite      | American Mineralogist, (1984) vol 69. pp 176 - 185 | J. Appl. Crystallogr. (1978), vol 11. pp 121-124 |
| Magnetite     | American Mineralogist, (1984) vol 69. pp 754 - 770 | American Mineralogist, (1984) vol 69. pp 754-770 |
